# Supplementary material for: InterPro in 2019: improving coverage, classification and access to protein sequence annotations
Source: PubMed Central journal article supplement (PMC6323941; doi:10.1093/nar/gky1100), 2018-11-06
Supplement: gky1100_supplemental_files.pdf [file gky1100_supplemental_files.pdf]

## SUPPLEMENTARY DATA

### API URL Structure

Endpoint blocks are the most important aspect of a query to the InterPro API. An endpoint block can be composed of up to 3 parts: an endpoint type (e.g., entry), a source database (e.g., InterPro) and a unique identifier (e.g., IPR00009). The endpoint type is mandatory, while the other two parts are optional.

The presence of the different parts of the main block define the filter and determine the type of response returned by the API. The following rules determine the response type:

- A query that only contains the endpoint type will return a list of aggregated values giving the total counts of all the unique entities, grouped by each data source of that type. For example, a query `/protein` will return a JSON object with the number of proteins in UniProtKB, including the reviewed and unreviewed sections.
- When the query includes a data source, the response is a paginated list of the entities that belong to that source, including some basic information. For example, the entities returned by the query `/structure/pdb` include the name, accession and experiment type for each PDB structure.
- If an accession block is part of the request, the response contains more detailed information about the requested entity. For example, the API response to the query `protein/UniProt/P50876` will be a JSON object containing all the available information for that protein that has been imported into InterPro, including its sequence, description, *etc.*

Requests can contain more than one endpoint block, so each of the results of the main block can be filtered by any other endpoint. In this way, a query such `/entry/protein/reviewed` defines the main endpoint as entry. As it doesn't include a data source or an accession, the response will return a count of how many entries exist per source database (InterPro, CATH-Gene3D, CDD, and so on). Since we have a second endpoint block in the URL ("reviewed"), the query will be restricted (in this case to just the reviewed proteins).

Additional functionality can be achieved by using the type-specific attributes outlined in Table S1. For example, the list of InterPro entries that represent domains can be obtained using the query `/entry/InterPro?type=domain`. This mechanism allows extension of the API, while conserving the general structure of the RESTful URL.

| Endpoint  | Source database(s)                                                                                                                              | Type-specific attributes | Notes                                                 |
|-----------|-------------------------------------------------------------------------------------------------------------------------------------------------|--------------------------|-------------------------------------------------------|
| Entry     | InterPro, CATH-Gene3D, CDD, HAMAP, PANTHER, Pfam, PIRSF, PRINTS, ProDom, PROSITE profiles, PROSITE patterns, SFLD, SMART, SUPERFAMILY, TIGRFAMs | annotation               | allows association of information, such as alignments |
|           |                                                                                                                                                 | go_term                  | filter based on GO terms                              |
|           |                                                                                                                                                 | go_category              | filter based on GO category                           |
|           |                                                                                                                                                 | integrated               | filter based on integration status                    |
|           |                                                                                                                                                 | type                     | filter by entry type (family, domain, etc)            |
| Protein   | UniProtKB                                                                                                                                       | ida                      | group by InterPro Domain Architecture                 |
|           |                                                                                                                                                 | residues                 | show per-residue annotation                           |
|           |                                                                                                                                                 | tax_id                   | filter by taxonomy                                    |
|           |                                                                                                                                                 | protein_evidence         | filter by protein evidence                            |
|           |                                                                                                                                                 | go_term                  | filter by GO term                                     |
|           |                                                                                                                                                 | match_presence           | filter by database hit                                |
| Structure | PDB                                                                                                                                             | resolution               | filter by resolution                                  |
|           |                                                                                                                                                 | experiment_type          | filter by experiment type                             |
| Set       | Pfam, CDD                                                                                                                                       | -                        | -                                                     |
| Proteome  | UniProtKB                                                                                                                                       | is_reference             | filter by reference proteomes                         |
| Taxonomy  | UniProtKB                                                                                                                                       | -                        | -                                                     |

**Table S1.** An overview of the endpoints in the InterPro API showing the databases and type-specific attributes that can be incorporated into REST requests.
